# Supplementary material for: Ascorbic acid-induced fiber-scrolling of titanium carbide Ti3C2Tx MXene
Source: Royal Society of Chemistry journal article supplement (doi:10.1039/d2ra03174d), 2022-01-01
Supplement: d2ra03174d1.pdf [file d2ra03174d1.pdf]

## Supporting Information for

# Ascorbic Acid-Induced Fiber-Scrolling of Titanium Carbide $\text{Ti}_3\text{C}_2\text{T}_x$ MXene

*Jinxin Cao,<sup>a</sup> Yuru Wang,<sup>a</sup> Bingqing Wei,<sup>b</sup> Jiaxin Ye<sup>c</sup> and Qing Zhang<sup>\*a</sup>*

<sup>a</sup>. Institutes of Physical Science and Information Technology, Anhui University, Hefei  
230039, Anhui, China

<sup>b</sup>. Department of Mechanical Engineering, University of Delaware, Newark, Delaware  
19716, USA

<sup>c</sup>. School of Mechanical Engineering, Hefei University of Technology, Hefei 230009,  
Anhui, China

\*E-mail: [zhangq@ahu.edu.cn](mailto:zhangq@ahu.edu.cn)

### **Supplementary Materials:**

Figures S1-S12

Tables S1-S5

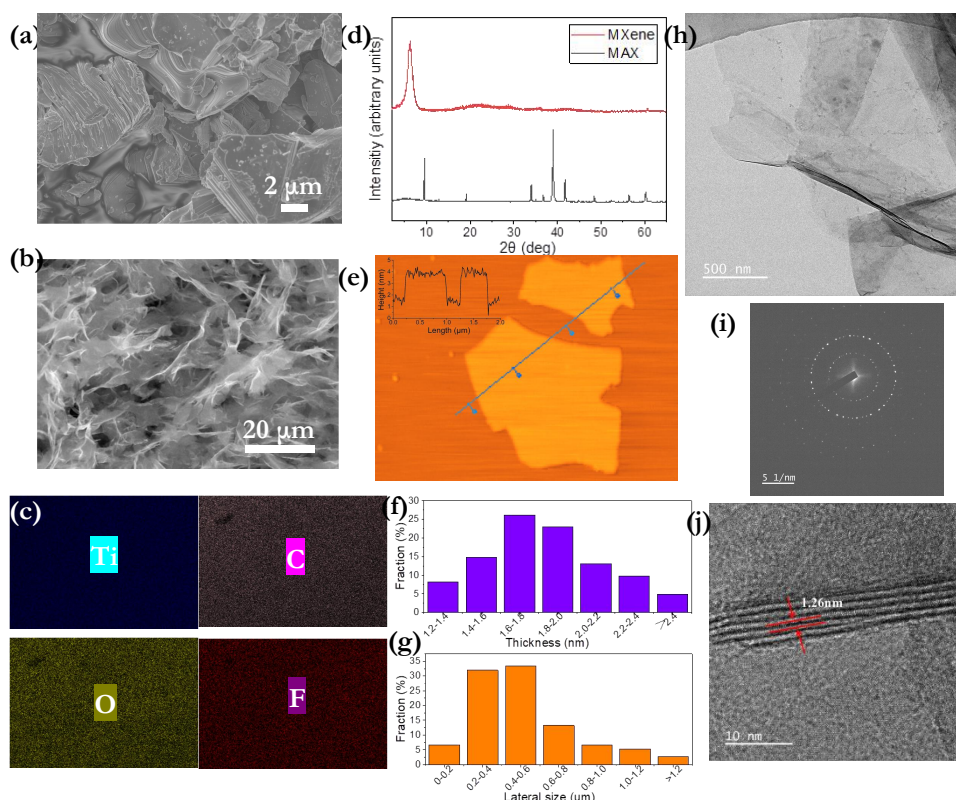

**Figure S1.** SEM of (a) MAX, (b) as-synthesized  $\text{Ti}_3\text{C}_2\text{T}_x$  MXene and (c) the corresponding EDS mapping; (d) XRD of MAX and the  $\text{Ti}_3\text{C}_2\text{T}_x$  MXene; (e) AFM image of the  $\text{Ti}_3\text{C}_2\text{T}_x$  MXene deposited on mica with height profile along with the blue line; (f) Thickness distribution and (g) lateral size distribution of the  $\text{Ti}_3\text{C}_2\text{T}_x$  MXene for 65 platelets; (h) TEM image, (i) electron diffraction pattern and (j) HR-TEM image of the  $\text{Ti}_3\text{C}_2\text{T}_x$  MXene.

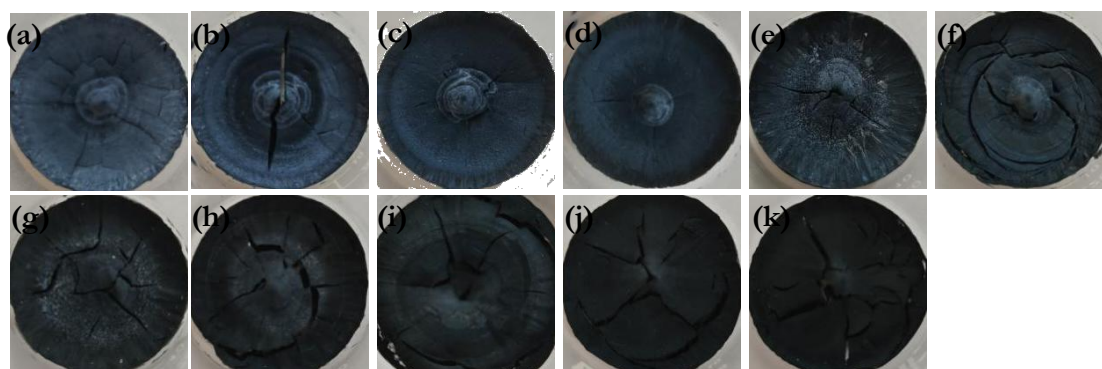

**Figure S2.** The optical photographs of  $\text{M}_x\text{AA}_y$ : As increasing the AA ratio ( $x:y = 10:0, 10:1, 10:2, 10:4, 10:6, 10:8, 10:10, 10:15, 10:17, 10:20, 10:25$ ), the obtained samples presented “soft to less-soft” texture and gradually darkening color.

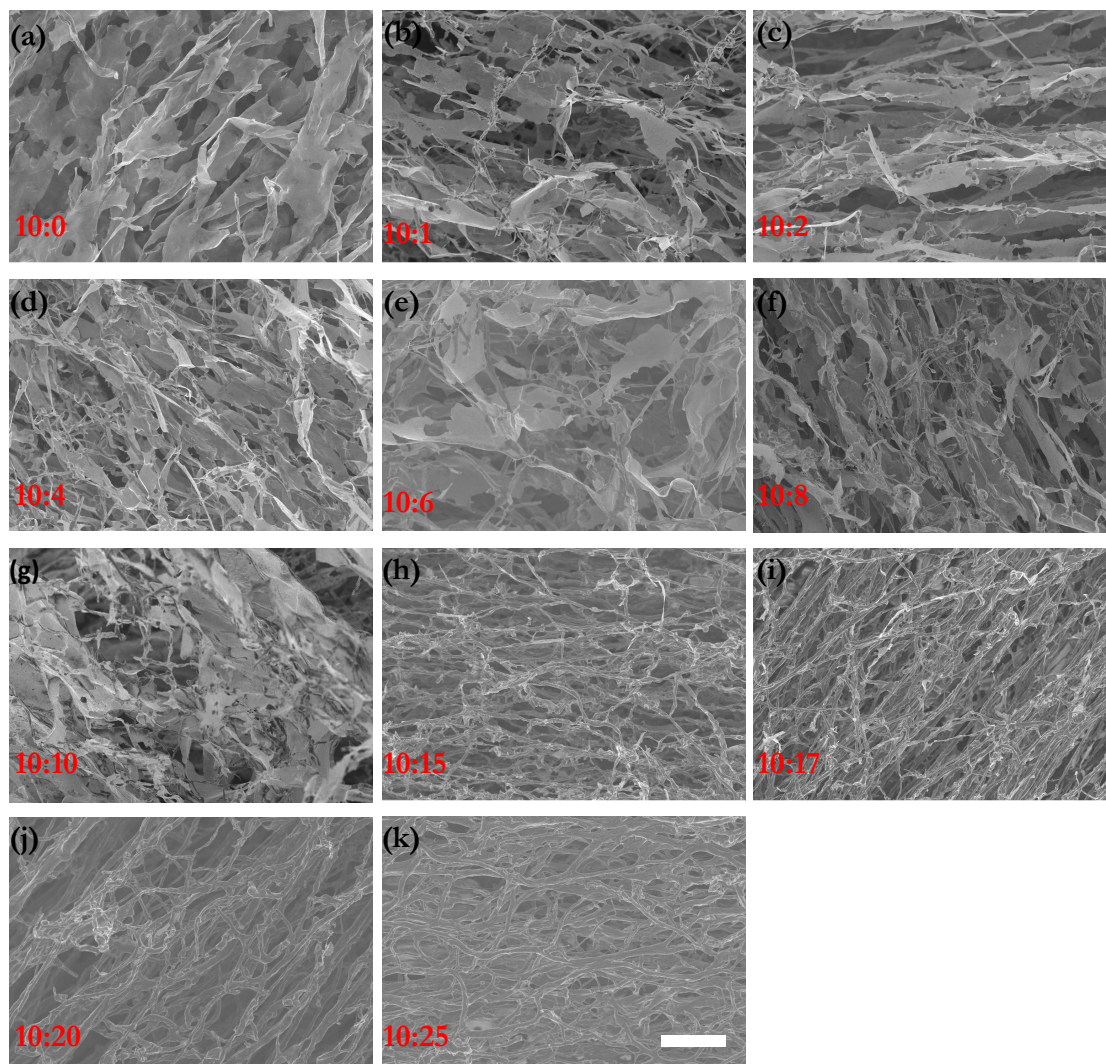

**Figure S3.** The SEM images of  $M_xAA_y$  (scale bar: 20  $\mu\text{m}$ ): Comparing the structures of 10:1, 10:2, and 10:4, besides the emergence of fibers, there is also an increase of the aspect ratio and the MXene flakes turns to long-strip shaped. In addition, it was worth noting that the length of a single fiber can reach tens or even hundreds of microns.

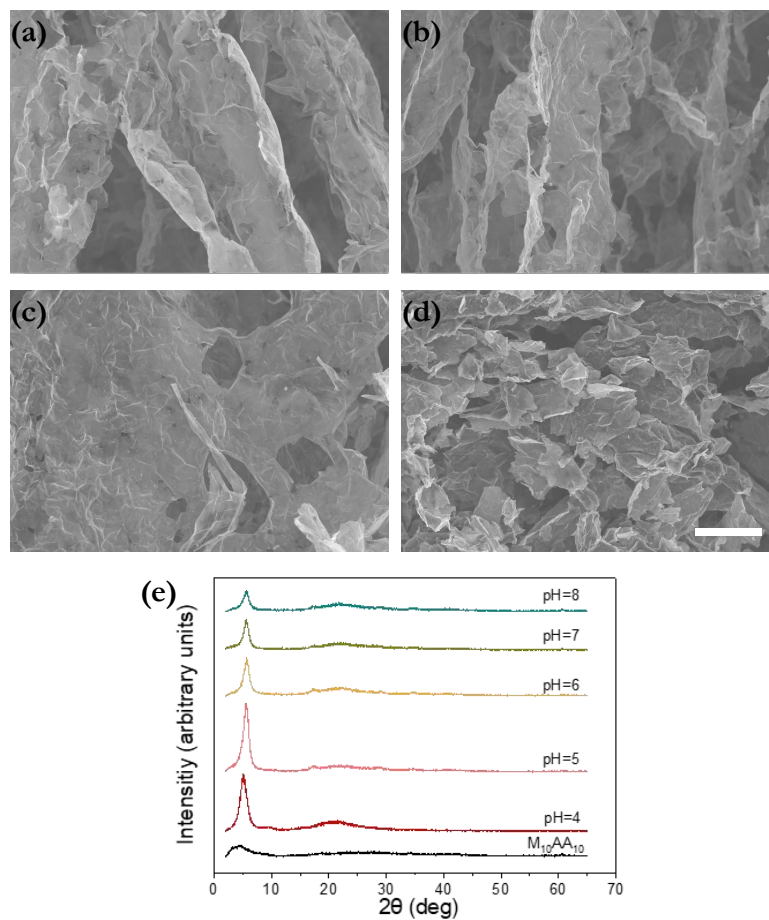

**Figure S4.** SEM images of  $M_{10}AA_{10}$  treated with  $NaHCO_3$ : (a) to pH = 5, (b) to pH = 6, (c) to pH = 7, and (d) to pH = 8; and the corresponding XRD results. (scale bar: 4  $\mu m$ ).

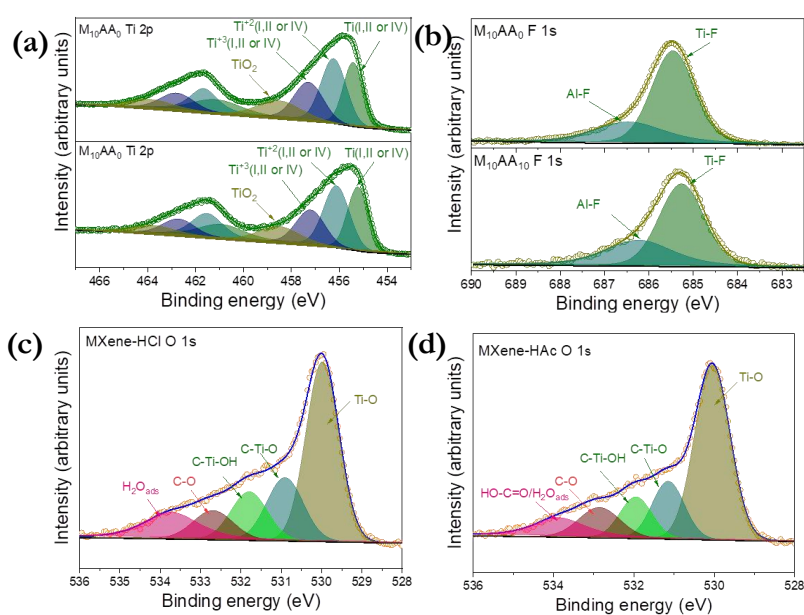

**Figure S5.** High-resolution XPS spectra: (a) Ti 2p and (b) F 1s of MXene ( $M_{10}AA_0$ ) and  $M_{10}AA_{10}$ ; O 1s of MXene treated with HCl (c) and of MXene treated with HAc (d).



**Table S1.** XPS fitting results for M<sub>10</sub>AA<sub>0</sub> and M<sub>10</sub>AA<sub>10</sub>.

| Peak(M <sub>10</sub> AA <sub>0</sub> ) | Position(eV)         | Area(%) | Peak(M <sub>10</sub> AA <sub>10</sub> ) | Position(eV)         | Area(%)      |
|----------------------------------------|----------------------|---------|-----------------------------------------|----------------------|--------------|
| Ti (I,II or IV) <sup>a)</sup>          | 455.412<br>(461.127) | 27.30   | Ti (I,II or IV)                         | 455.212<br>(460.903) | 29.30        |
| Ti <sup>+2</sup> (I,II or IV)          | 456.229<br>(461.651) | 34.70   | Ti <sup>+2</sup> (I,II or IV)           | 456.106<br>(461.508) | 35.42        |
| Ti <sup>+3</sup> (I,II or IV)          | 457.272<br>(462.772) | 23.19   | Ti <sup>+3</sup> (I,II or IV)           | 457.189<br>(462.693) | 21.70        |
| TiO <sub>2</sub>                       | 458.528<br>(463.920) | 14.82   | TiO <sub>2</sub>                        | 458.512<br>(463.806) | 13.58        |
| C-Ti                                   | 282.217              | 42.87   | C-Ti                                    | 281.990              | 15.07        |
| C-Ti-O                                 | 283.008              | 11.52   | C-Ti-O                                  | 282.945              | 5.71         |
| sp <sup>2</sup> C                      | 284.807              | 33.19   | sp <sup>2</sup> C                       | 284.834              | 14.00        |
| C-O                                    | 286.287              | 12.42   | C-O                                     | 286.377              | 28.75        |
|                                        |                      |         | <b>C-O-Ti</b>                           | <b>286.949</b>       | <b>21.96</b> |
|                                        |                      |         | O-C=O                                   | 288.683              | 11.57        |
|                                        |                      |         | C-F                                     | 291.931              | 2.94         |
| Ti-O                                   | 530.159              | 51.62   | Ti-O                                    | 529.969              | 10.09        |
| C-Ti-O                                 | 531.123              | 15.80   | C-Ti-O                                  | 530.759              | 1.67         |
| C-Ti-OH                                | 531.970              | 12.39   | <b>C-O-Ti</b>                           | <b>531.522</b>       | <b>5.40</b>  |
| C-O                                    | 532.813              | 10.70   | C-Ti-OH                                 | 532.231              | 13.01        |
| H <sub>2</sub> O <sub>ads</sub>        | 533.889              | 9.49    | C-O                                     | 533.105              | 38.18        |
|                                        |                      |         | O-C=O/H <sub>2</sub> O <sub>ads</sub>   | 533.810              | 31.65        |
| Ti-F                                   | 685.459              | 71.11   | Ti-F                                    | 685.251              | 64.47        |
| Al-F                                   | 686.455              | 28.89   | Al-F                                    | 686.219              | 35.53        |

**Table S2.** XPS fitting results for MXene treated with HCl and HAc.

| Peak(HCl)                       | Position(eV)          | Area(%) | Peak(HAc)                             | Position(eV)         | Area(%) |
|---------------------------------|-----------------------|---------|---------------------------------------|----------------------|---------|
| Ti (I,II or IV) <sup>a)</sup>   | 455.350<br>(461.100)  | 31.62   | Ti (I,II or IV)                       | 455.380<br>(461.134) | 35.41   |
| Ti <sup>+2</sup> (I,II or IV)   | 456.230<br>(461.650)  | 29.39   | Ti <sup>+2</sup> (I,II or IV)         | 456.240<br>(461.621) | 22.41   |
| Ti <sup>+3</sup> (I,II or IV)   | 457.270<br>(462.770 ) | 18.00   | Ti <sup>+3</sup> (I,II or IV)         | 457.111<br>(462.862) | 23.91   |
| TiO <sub>2</sub>                | 458.528<br>(463.920)  | 20.98   | TiO <sub>2</sub>                      | 458.530<br>(463.926) | 18.26   |
| C-Ti                            | 282.165               | 41.50   | C-Ti                                  | 282.194              | 43.19   |
| C-Ti-O                          | 282.917               | 10.95   | C-Ti-O                                | 283.049              | 7.65    |
| sp <sup>2</sup> C               | 284.800               | 30.10   | sp <sup>2</sup> C                     | 284.800              | 38.03   |
| C-O                             | 286.246               | 17.46   | C-O                                   | 286.385              | 9.10    |
|                                 |                       |         | O-C=O/H <sub>2</sub> O <sub>ads</sub> | 289.131              | 2.03    |
| Ti-O                            | 529.972               | 45.72   | Ti-O                                  | 530.045              | 51.81   |
| C-Ti-O                          | 530.898               | 17.73   | C-Ti-O                                | 531.142              | 15.42   |
| C-Ti-OH                         | 531.784               | 13.52   | C-Ti-OH                               | 531.946              | 11.08   |
| C-O                             | 532.681               | 8.81    | C-O                                   | 532.856              | 10.32   |
| H <sub>2</sub> O <sub>ads</sub> | 533.726               | 14.22   | O-C=O/H <sub>2</sub> O <sub>ads</sub> | 533.876              | 11.36   |
| Ti-F                            | 685.207               | 85.61   | Ti-F                                  | 685.208              | 77.90   |
| Al-F                            | 686.455               | 14.39   | Al-F                                  | 686.326              | 22.10   |

<sup>a)</sup> (I refers to Ti atoms bonded to C atoms and one O atom; II refers to Ti atoms bonded to C atoms and an OH group; IV refers to Ti atoms bonded to OH terminations that physisorbed to water molecules).<sup>42</sup>

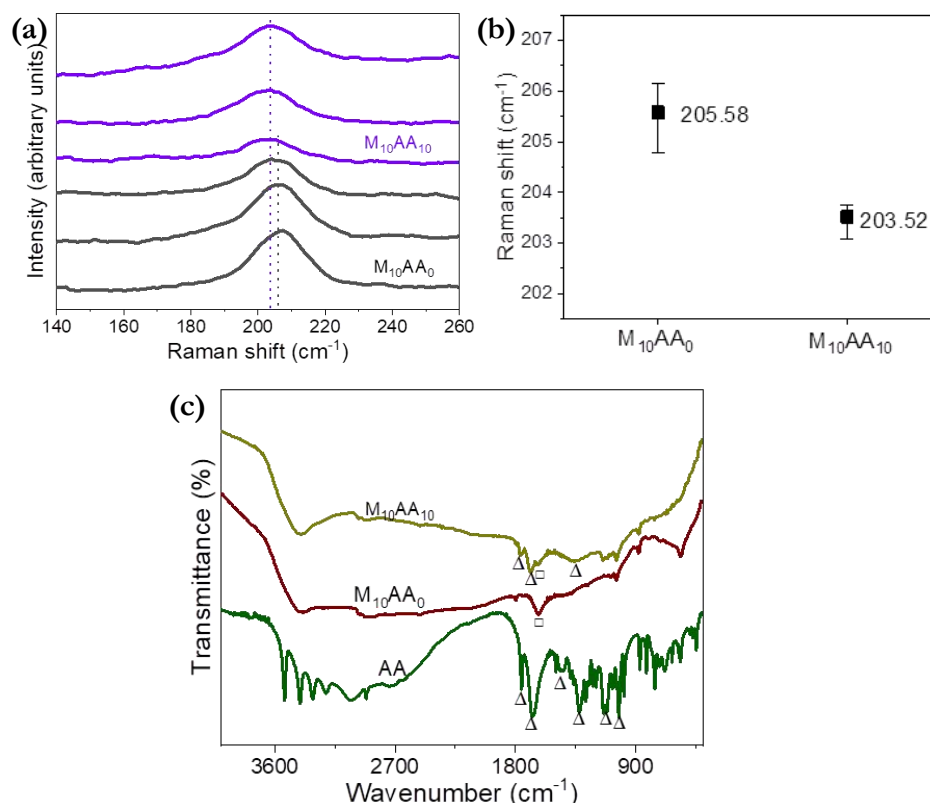

**Figure S6.** Raman spectra of M<sub>10</sub>AA<sub>0</sub> and M<sub>10</sub>AA<sub>10</sub>: (a) ranged from 140 to 260 cm<sup>-1</sup> and (b) the corresponding peak shifts as statistically derived from (a); (c) FTIR spectra of M<sub>10</sub>AA<sub>0</sub> and M<sub>10</sub>AA<sub>10</sub> and AA.

In particular, Raman results of M<sub>10</sub>AA<sub>0</sub> and M<sub>10</sub>AA<sub>10</sub> both show characteristic peaks of Ti<sub>3</sub>C<sub>2</sub>T<sub>x</sub> MXene (Figure 3b), where the A<sub>1g</sub> mode around 204 cm<sup>-1</sup> represents the overall out-of-plane vibrations of titanium atoms, carbon atoms and surface groups. The region 230-470 cm<sup>-1</sup> is the E<sub>g</sub> mode, which represents the in-plane vibrations of the surface groups attached to the titanium atoms. The region 580-730 cm<sup>-1</sup> is mainly due to carbon vibrations (both the A<sub>1g</sub> and E<sub>g</sub> mode).<sup>46</sup>

The FTIR spectrum of pure AA admits characteristic peaks at 1757 cm<sup>-1</sup> (C=O stretching), 1667 cm<sup>-1</sup> (C=C stretching), 1455 cm<sup>-1</sup> (C-H bending), 1320 cm<sup>-1</sup> (C=C-OH), 1120 cm<sup>-1</sup> (C-O-C stretching) and 1026 cm<sup>-1</sup> (C-O bending).<sup>36,49</sup> M<sub>10</sub>AA<sub>0</sub> (Ti<sub>3</sub>C<sub>2</sub>T<sub>x</sub>) admits a characteristic peak at 1633 cm<sup>-1</sup> assigned to the functional group -OH on the surface of Ti<sub>3</sub>C<sub>2</sub>T<sub>x</sub>.<sup>36</sup> M<sub>10</sub>AA<sub>10</sub> shows characteristic peaks from both AA and Ti<sub>3</sub>C<sub>2</sub>T<sub>x</sub>; moreover, two peaks at 1143 cm<sup>-1</sup>, 1114 cm<sup>-1</sup> located close to C-O-C stretching vibration of AA, possibly overlapped with peaks due to C-O stretching vibration of C-O-Ti bidentate complexes.<sup>47</sup>



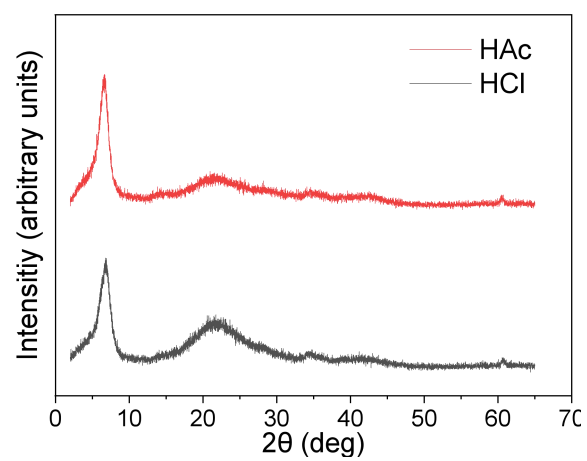

**Figure S7.** XRD results of MXene treated with HAc and HCl.

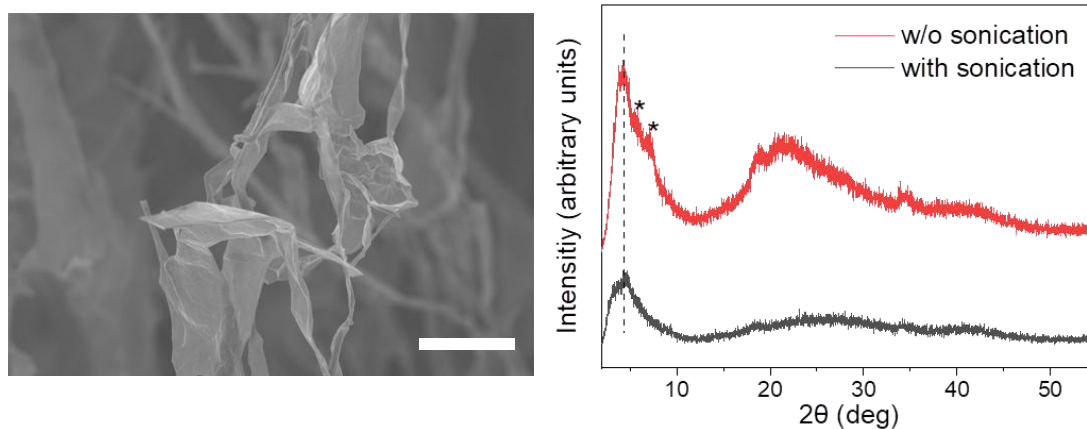

**Figure S8.** SEM image of MXene:AA (10:10) without sonication treatment and XRD results of MXene:AA (10:10) with and without sonication treatment (Scale bar: 4  $\mu\text{m}$ ).

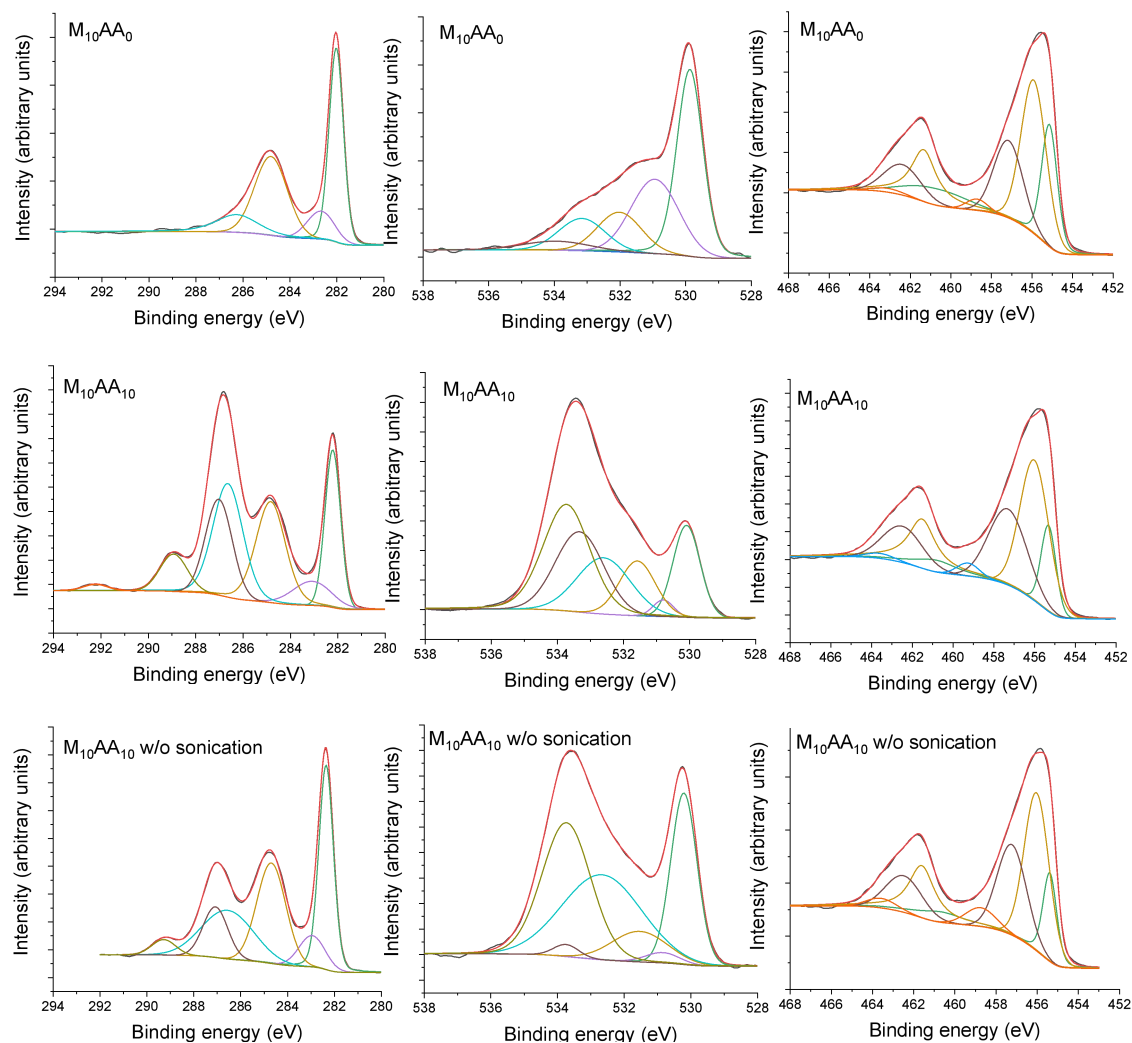

**Figure S9.** High-resolution XPS spectra: C 1s, O 1s and Ti 2p of MXene ( $M_{10}AA_0$ ),  $M_{10}AA_{10}$  and  $M_{10}AA_{10}$  without sonication treatment.

**Table S3.** XPS fitting results for M<sub>10</sub>AA<sub>0</sub>, M<sub>10</sub>AA<sub>10</sub> and M<sub>10</sub>AA<sub>10</sub> without sonication treatment.

| Peak<br>(M <sub>10</sub> AA <sub>0</sub> ) | Position<br>(eV)                   | Area (%)                       | Peak<br>(M <sub>10</sub> AA <sub>10</sub> ) | Position<br>(eV)                | Area (%)                       | Peak<br>(M <sub>10</sub> AA <sub>10</sub> ,<br>w/o<br>sonication) | Position<br>(eV)                 | Area (%)                       |
|--------------------------------------------|------------------------------------|--------------------------------|---------------------------------------------|---------------------------------|--------------------------------|-------------------------------------------------------------------|----------------------------------|--------------------------------|
| Ti (I,II or IV) <sup>a)</sup>              | 455.142<br>(460.75)                | 24.68                          | Ti (I,II or IV) <sup>a)</sup>               | 455.311<br>(460.835)            | 15.24                          | Ti (I,II or IV) <sup>a)</sup>                                     | 455.386<br>(460.711)             | 15.96                          |
| Ti <sup>+2</sup> (I,II or IV)              | 455.916<br>(461.339)               | 46.25                          | Ti <sup>+2</sup> (I,II or IV)               | 456.007<br>(461.516)            | 47.76                          | Ti <sup>+2</sup> (I,II or IV)                                     | 456.025<br>(461.606)             | 46.42                          |
| Ti <sup>+3</sup> (I,II or IV)              | 457.163<br>(462.405)               | 26.29                          | Ti <sup>+3</sup> (I,II or IV)               | 457.305<br>462.498              | 33.70                          | Ti <sup>+3</sup> (I,II or IV)                                     | 457.234<br>462.489               | 31.00                          |
| <b>TiO<sub>2</sub></b>                     | <b>458.709</b><br><b>(463.113)</b> | <b>2.77</b>                    | <b>TiO<sub>2</sub></b>                      | <b>459.26</b><br><b>463.597</b> | <b>3.30</b>                    | <b>TiO<sub>2</sub></b>                                            | <b>458.742</b><br><b>463.583</b> | <b>6.62</b>                    |
| C-Ti                                       | 282.026                            | 40.87                          | C-Ti                                        | 282.215                         | 17.64                          | C-Ti                                                              | 282.357                          | 28.90                          |
| C-Ti-O                                     | 282.678                            | 10.62                          | C-Ti-O                                      | 283.085                         | 6.80                           | C-Ti-O                                                            | 282.956                          | 7.42                           |
| sp <sup>2</sup> C                          | 284.807                            | 35.95                          | sp <sup>2</sup> C                           | 284.838                         | 23.05                          | sp <sup>2</sup> C                                                 | 284.694                          | 26.28                          |
| C-O                                        | 286.263                            | 12.56                          | C-O                                         | 286.642                         | 25.81                          | C-O                                                               | 286.558                          | 22.78                          |
|                                            |                                    |                                | <b>C-O-Ti</b>                               | <b>287.024</b>                  | <b>18.36</b>                   | <b>C-O-Ti</b>                                                     | <b>287.076</b>                   | <b>11.30</b>                   |
|                                            |                                    |                                | O-C=O                                       | 288.931                         | 7.31                           | O-C=O                                                             | 289.279                          | 3.32                           |
|                                            |                                    |                                | C-F                                         | 292.225                         | 1.04                           |                                                                   |                                  |                                |
| Ti-O                                       | 529.874                            | 41.79<br>(50.03)               | Ti-O                                        | 530.091                         | 14.52<br>(31.66)               | Ti-O                                                              | 530.21                           | 22.45<br>(34.35)               |
| C-Ti-O                                     | 530.938                            | 27.97<br>(33.48)               | C-Ti-O                                      | 530.795                         | 1.96<br>(4.27)                 | C-Ti-O                                                            | 530.847                          | 1.70<br>(2.61)                 |
| <b>C-Ti-OH</b>                             | <b>532.019</b>                     | <b>13.77</b><br><b>(16.49)</b> | C-O-Ti                                      | 531.58                          | 11.73<br>(25.58)               | C-O-Ti                                                            | 531.531                          | 8.27<br>(12.65)                |
| C-O                                        | 533.159                            | 11.77                          | <b>C-Ti-OH</b>                              | <b>532.601</b>                  | <b>17.64</b><br><b>(38.48)</b> | <b>C-Ti-OH</b>                                                    | <b>532.665</b>                   | <b>32.92</b><br><b>(50.38)</b> |
| H <sub>2</sub> O <sub>ads</sub>            | 533.942                            | 4.70                           | C-O                                         | 533.33                          | 22.66                          | C-O                                                               | 533.74                           | 1.48                           |
|                                            |                                    |                                | O-C=O<br>/H <sub>2</sub> O <sub>ads</sub>   | 533.725                         | 31.49                          | O-C=O<br>/H <sub>2</sub> O <sub>ads</sub>                         | 533.732                          | 33.17                          |

\*Note: In O 1s, atomic ratios given in brackets are calculated with C-O and O-C=O /H<sub>2</sub>O<sub>ads</sub> excluded.

MXene:AA (10:10) without sonication shows different morphology (with curled scrolls, but not tightly structured fibers) from M<sub>10</sub>AA<sub>10</sub>. As shown in the above XRD results, MXene:AA (10:10) without sonication showed two peaks on the right side shoulder, indicating relatively incomplete AA intercalation as compared to M<sub>10</sub>AA<sub>10</sub>;

moreover, the broad shoulder on the left side is only observed in M<sub>10</sub>AA<sub>10</sub>, not in MXene:AA (10:10) without sonication, which means no fiber formation without sonication, consistent with the SEM results.

As shown in the Table S3, probe sonication has several effects: 1 atomic ratio of TiO<sub>2</sub> is slightly decreased from 6.62 at.% to 3.30 at% (Ti 2p); 2 atomic ratios of C-O-Ti are raised, from 11.30 at.% to 18.36 at.% (C 1s) and from 8.27 at.% to 11.73 at.% (O 1s); 3 atomic ratio of C-Ti-OH is reduced from 32.92 at.% to 17.64 at.% (13.77 at.% before mixing with AA). Based on the research of Gogotsi *et al.*<sup>50</sup>,

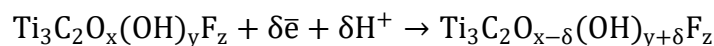

is the electrochemical reaction possibly happening in the Ti<sub>3</sub>C<sub>2</sub>T<sub>x</sub> MXene. Therefore, after mixing with MXene, AA can be oxidized into dehydroascorbic acid, producing e<sup>-</sup> and H<sup>+</sup>, and at the same time, C-Ti-O transforms into C-Ti-OH, while probe sonication promotes the formation of C-O-Ti. Probe sonication also leads to slight reduction of MXene.

Hence, sonication treatment promotes the AA intercalation as well as the formation of C-O-Ti bonding and is indispensable for successful fiber formation.

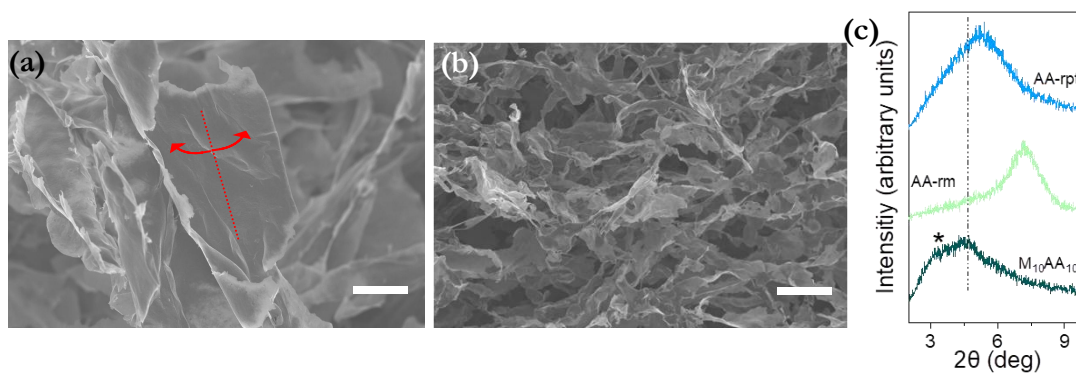

**Figure S10.** SEM images of (a)  $M_{10}AA_{10}$  with AA removed (AA-rm) and (b) then repeating treatment with AA again (AA-rpt) and (c) their XRD results (scale bar: 10  $\mu\text{m}$ ).

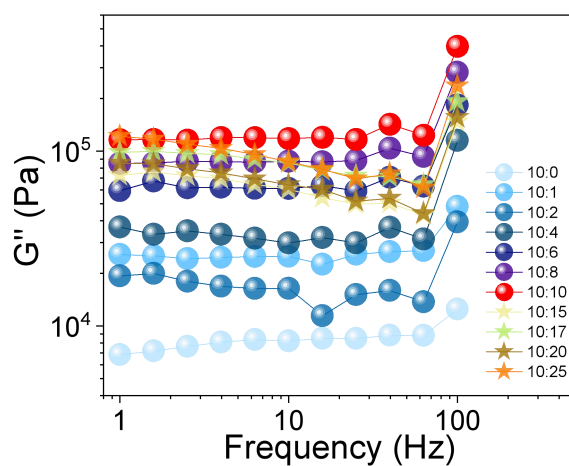

**Figure S11.** Loss modulus  $G''$  vs. frequency of  $M_{10}AA_x$  with different AA ratios at constant strain of 0.1%.



**Table S4.** Thickness and aspect ratio of pressed  $M_{10}AA_x$  films with different AA ratios for conductivity measurement.

| Sample       | Thickness<br>( $\mu\text{m}$ ) | Aspect<br>Ratio | Sample          | Thickness<br>( $\mu\text{m}$ ) | Aspect<br>Ratio |
|--------------|--------------------------------|-----------------|-----------------|--------------------------------|-----------------|
| $M_{10}AA_0$ | 5                              | 4               | $M_{10}AA_{10}$ | 9                              | 2.5             |
| $M_{10}AA_1$ | 5                              | 4               | $M_{10}AA_{15}$ | 11                             | 2               |
| $M_{10}AA_2$ | 6                              | 3               | $M_{10}AA_{17}$ | 14                             | 3               |
| $M_{10}AA_4$ | 10                             | 2               | $M_{10}AA_{20}$ | 24                             | 2               |
| $M_{10}AA_6$ | 9                              | 3               | $M_{10}AA_{25}$ | 22                             | 3               |
| $M_{10}AA_8$ | 8                              | 5.7             |                 |                                |                 |

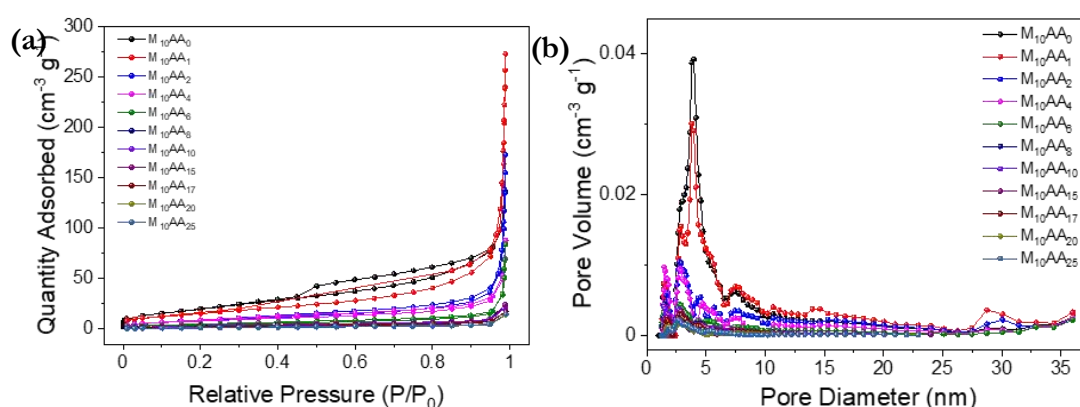

**Figure S12.** (a)  $N_2$  adsorption-desorption isotherms and (b) pore size distribution curves of  $M_{10}AA_x$  with different AA ratios.

**Table S5.** Specific surface area and average pore diameter of  $M_{10}AA_x$  with different AA ratios.

| Sample       | Surface<br>Area<br>( $\text{m}^2 \cdot \text{g}^{-1}$ ) | Average<br>pore<br>diameter<br>(nm) | Sample          | Surface<br>Area<br>( $\text{m}^2 \cdot \text{g}^{-1}$ ) | Average<br>pore<br>diameter<br>(nm) |
|--------------|---------------------------------------------------------|-------------------------------------|-----------------|---------------------------------------------------------|-------------------------------------|
| $M_{10}AA_0$ | 76.271                                                  | 3.969                               | $M_{10}AA_{10}$ | 10.633                                                  | 1.475                               |
| $M_{10}AA_1$ | 57.733                                                  | 3.794                               | $M_{10}AA_{15}$ | 8.698                                                   | 2.897                               |
| $M_{10}AA_2$ | 32.459                                                  | 2.769                               | $M_{10}AA_{17}$ | 7.912                                                   | 2.769                               |
| $M_{10}AA_4$ | 29.859                                                  | 1.475                               | $M_{10}AA_{20}$ | 4.974                                                   | 2.769                               |
| $M_{10}AA_6$ | 15.581                                                  | 2.769                               | $M_{10}AA_{25}$ | 4.263                                                   | 2.647                               |
| $M_{10}AA_8$ | 10.431                                                  | 1.475                               |                 |                                                         |                                     |
